# Supplementary material
Source: Springer Nature journal article supplement (https://www.springermedizin.de/resource/supplementary/12933_2010_235_MOESM1_ESM.pdf/9539904)

## Inclusion criteria

type 2 diabetes  
age: 20 to 79,  
given premixed insulin  
or premixed insulin analogue  
twice daily

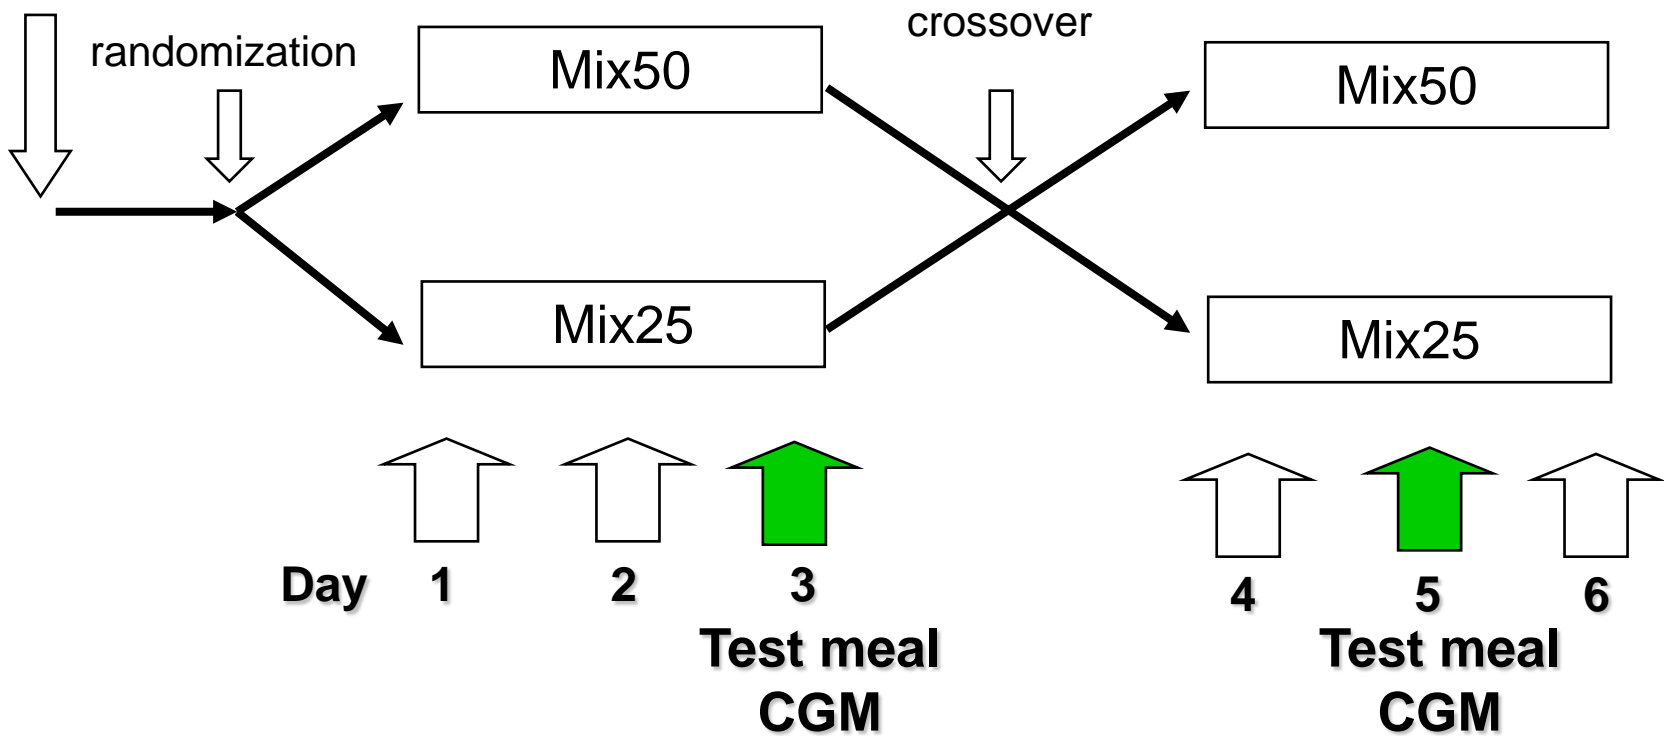

Supplement: MOESM1 [file 9539904]
